# 1 Germanium nanospheres for ultraresolution 2 picotensiometry of kinesin motors

3 Swathi Sudhakar<sup>1</sup>, Mohammad Kazem Abdosamadi<sup>1</sup>, Tobias Jörg Jachowski<sup>1</sup>, Michael  
4 Bugiel<sup>1</sup>, Anita Jannasch<sup>1</sup> & Erik Schäffer<sup>1,\*</sup>

5 <sup>1</sup>*Eberhard Karls Universität Tübingen, ZMBP, Auf der Morgenstelle 32, 72076 Tübingen,*  
6 *Germany*

7 *\*Corresponding author: erik.schaeffer@uni-tuebingen.de*

8 **Force spectroscopy on single molecular machines generating piconewton forces is of-**  
9 **ten performed using optical tweezers.<sup>1-3</sup> Since optical forces scale with the trapped**  
10 **particle volume, piconewton force measurements require micron-sized probes prac-**  
11 **tically limiting the spatiotemporal resolution.<sup>1,2,4,5</sup> Here, we have overcome this limit**  
12 **by developing high-refractive index germanium nanospheres as ultraresolution trap-**  
13 **ping probes. Using these probes, we have dissected the molecular motion of the cy-**  
14 **toskeletal motor kinesin-1 that transports vesicles along microtubule filaments. With**  
15 **a superior spatiotemporal resolution, we have resolved a controversy unifying its**  
16 **stepping and detachment behavior. We found that single motors took 4-nm-center-**  
17 **of-mass steps with alternating force dependence of their dwell times. At maximum**  
18 **force, motors did not detach but switched to a weakly bound state. In this state, mo-**

19 **tors slid on the microtubule with 8-nm steps on a microsecond time scale. Kinesins**  
20 **remained in this intermediate slip state before either truly detaching or reengaging**  
21 **in directed motion. Surprisingly, reengagement and, thus, rescue of directed motion**  
22 **occurred in about 80 percent of events. Such rescue events suggest that macroscopi-**  
23 **cally observed run lengths of individual motors are concatenations and rescues need**  
24 **to be accounted for to understand long-range transport. Furthermore, teams of mo-**  
25 **tors involved in transport may be synchronized through the weakly bound slip state.**  
26 **Apart from ultraresolution optical trapping, germanium nanospheres are promising**  
27 **candidates for applications ranging from nanophotonics to energy storage.**

28 Molecular motors and trapping probes are subjected to Brownian motion that funda-  
29 mentally limits the spatiotemporal resolution of optical tweezers.<sup>5</sup> By temporal averaging  
30 over this motion, discrete motor steps of size  $\delta$  and the time between steps—the dwell time  
31  $\tau$ —can be resolved. Such single-molecule measurements have provided unprecedented in-  
32 sight into essential mechanochemical processes of life.<sup>1–3</sup> However, many such processes  
33 cannot be measured at their native spatiotemporal resolution but only under conditions—  
34 for example, low nucleotide concentrations—at which the mechanochemistry is slowed  
35 down and might be different.<sup>6</sup> For example, the benchmark, 3.4-Å-DNA-base-pair-sized  
36 steps of the RNA polymerase, naturally operating on a millisecond time scale, could only  
37 be resolved on a second time scale.<sup>7</sup> The inherent trade-off between temporal and spatial

38 precision and the resolution limit itself are quantified by the product  $\delta\sqrt{\tau}$  that has a con-  
39 stant value, with the lower limit hardly depending on the experiment.<sup>2,5</sup> Thus, this relation  
40 implies that detecting 8-nm steps of a kinesin motor on a millisecond time scale is as chal-  
41 lenging as measuring Å-steps on a second time scale. Furthermore, apart from reducing  
42 linker compliance between probe and molecular machine, spatiotemporal resolution can  
43 only be significantly improved relative to the benchmark by the use of nanometer-sized  
44 optical trapping probes.<sup>2,5</sup> However, such probes for piconewton-force measurements do  
45 not exist.

46 Cytoskeletal motors like kinesins drive many essential cellular processes by coupling  
47 ATP hydrolysis to perform mechanical work.<sup>8</sup> During an ATP hydrolysis cycle, kinesin  
48 motors advance by 8 nm along microtubules against forces of several piconewtons via a  
49 rotational hand-over-hand mechanism.<sup>6,9</sup> While consensus develops on how kinesin mo-  
50 tors work<sup>10,11</sup> important details remain unclear. For example, it is controversial whether  
51 intermediate mechanical steps in the hydrolysis cycle exist and can support load.<sup>12-17</sup> Fur-  
52 thermore, to enhance transport in crowded cells, kinesin motors work cooperatively in  
53 small teams.<sup>18-20</sup> Key for team performance is how loads due to unsynchronized or oppos-  
54 ing motors and obstacles affect transport distance.<sup>18-21</sup> This distance and force generation  
55 are limited by motor detachment. However, how kinesins detach from microtubules is not  
56 known.<sup>19,21</sup>

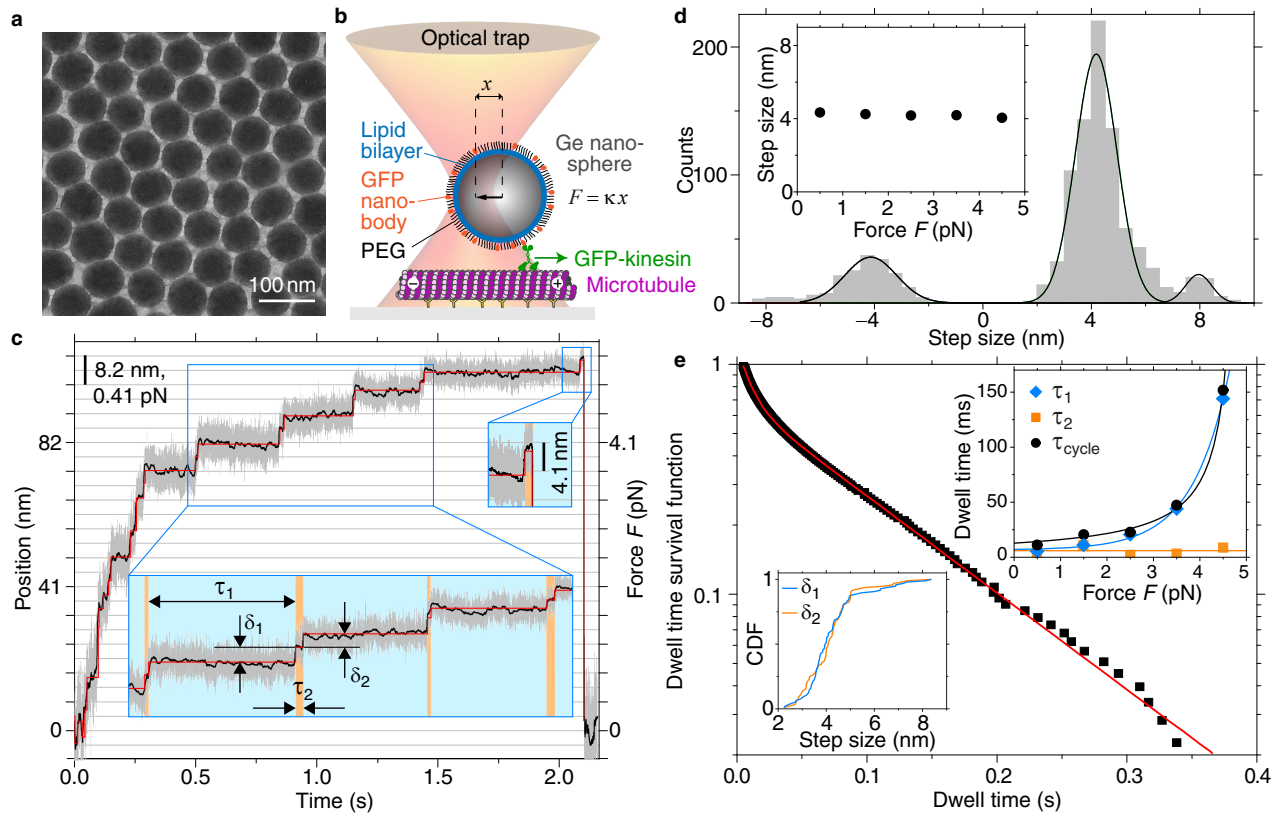

**Fig. 1 | Ultraresolution kinesin traces employing optically trapped germanium nanospheres.** **a**, TEM image of  $\approx 70$  nm germanium nanospheres (GeNTOPs). **b**, Schematic of a kinesin motor transporting a functionalized GeNTOP along a microtubule roughly drawn to scale except for the too small optical trap (see text and methods for details). **c**, Time trace for a single-kinesin powered GeNTOP (100 kHz bandwidth, grey trace; filtered data,  $\approx 100$  Hz, black trace; detected steps, red line; see methods). Insets: magnified view of last and intermediate steps with definition of long and short dwell times  $\tau_1$  (blue shaded) and  $\tau_2$  (orange shaded) with corresponding step sizes  $\delta_1$  and  $\delta_2$ , respectively. **d**, Step size histogram with a multi-Gaussian fit (line). Inset: Dominant step size versus force. **e**, Dwell time distribution of steps for  $F$  between 2–3 pN with fit (red line). Inset: Dwell times (symbols) with models (lines) versus force (top right, see methods); and cumulative distribution function (CDF) of alternating step sizes (bottom left).

## 57 **Germanium nanospheres for ultraprecision spatiotemporal measurements**

58 To resolve how kinesin steps and detaches, we enhanced the spatiotemporal precision of  
59 optical tweezers by compensating the particle-volume-scaling of trapping forces in the  
60 Rayleigh regime with the use of highest infrared refractive index **germanium nanospheres**  
61 as **trappable optical probes** (GeNTOPs). While various methods exist to make dielectric  
62 semiconductor nanoparticles,<sup>22–26</sup> none provide water-stable, monodisperse, sufficiently  
63 large nanospheres for picotensiometry in adequate amounts. The synthesis that we devel-  
64 oped derives from a solution-based method<sup>24</sup> and resulted in uniform GeNTOPs with a  
65 size of  $72.0 \pm 0.8$  nm (mean  $\pm$  standard error unless noted otherwise,  $N = 100$ ) measured  
66 by transmission electron microscopy (TEM, Fig. 1a, see methods for details). To deter-  
67 mine whether the spatiotemporal trapping precision of GeNTOPs was improved compared  
68 to commonly used microspheres, we trapped GeNTOPs in an ultrastable optical tweezers  
69 setup<sup>27</sup> (Extended Data Fig. 1) and calibrated them by a combined power spectral den-  
70 sity–drag force method<sup>28,29</sup> (Extended Data Fig. 2). The GeNTOP calibration showed that  
71 we achieved the optical-trap spring constant—the trap stiffness  $\kappa$ —necessary for kinesin  
72 picotensiometry employing microspheres.<sup>6,9,12–14</sup> Also, for the used laser power, the trap  
73 stiffness quantitatively agreed with a Mie theory calculation confirming that GeNTOPs  
74 had indeed the expected very high refractive index of 4.4 at the trapping laser wavelength  
75 of 1064 nm (see methods). Thus, because of the GeNTOPs’ nanometric size and high

76 refractive index, spatial precision is significantly improved and the trap response time re-  
77 duced by about an order of magnitude to  $\tau_{\text{trap}} = (2\pi f_c)^{-1} = \gamma/\kappa \approx 10 \mu\text{s}$ , where  $f_c$  is the  
78 corner frequency and  $\gamma$  is the drag coefficient (Extended Data Fig. 2). By using a higher  
79 trap stiffness and/or smaller GeNTOPs, the response time can be reduced further.

## 80 **Membrane-coated GeNTOPs for kinesin transport**

81 To mimic *in vivo* vesicles while minimizing linker compliance and nonspecific interac-  
82 tions, we coated GeNTOPs with a PEGylated lipid bilayer functionalized with nanobod-  
83 ies that bound truncated, recombinant green-fluorescent-protein-(GFP)-tagged kinesin-1  
84 motors hereafter called kinesin (Fig. 1b, Extended Data Fig. 3, see methods). The func-  
85 tionalization increased the GeNTOP diameter to  $93 \pm 4 \text{ nm}$  according to dynamic light  
86 scattering. This diameter corresponds to the average size of neuronal transport vesicles.<sup>18</sup>  
87 Thus, dimensions and the force geometry when using GeNTOPs resemble conditions in-  
88 side cells. By using a low motor-to-GeNTOP ratio for further optical tweezers exper-  
89 iments, we ensured that only single kinesins transported GeNTOPs along microtubules  
90 with the expected speed and run length quantified by interference reflection microscopy<sup>30</sup>  
91 (Extended Data Fig. 3, see methods).

92 **Kinesin takes 4-nm steps**

93 To dissect the kinesin gait, we trapped single-kinesin-functionalized GeNTOPs at phys-  
94 iological ATP concentrations, placed them on microtubules, and recorded the kinesin-  
95 powered GeNTOP displacement from the trap centre (Fig. 1b). Based on this displacement  
96  $x$  within the linear response of the GeNTOPs (inset Extended Data Fig. 2), the Hookean  
97 spring load of the optical tweezers corresponds to a force  $F = \kappa x$ . In the exemplary trace  
98 of Fig. 1c (see more examples in Extended Data Fig. 4), motors slowed down with increas-  
99 ing force up to  $\approx 5$  pN. Also with increasing force, stepwise motion became more evident  
100 until GeNTOPs quickly returned to the trap centre (in Fig. 1c at  $\approx 2.1$  s). To determine step  
101 sizes and dwell times, we used an efficient, automated filtering and step finding algorithm  
102 (see methods). Remarkably, instead of 8-nm steps,<sup>9</sup> most forward-directed, centre-of-mass  
103 steps were  $4.12 \pm 0.03$  nm (centre of Gaussian  $\pm$  fit error) consistent with the size of a  
104 tubulin monomer. Because step size hardly depended on force (inset Fig. 1d, Extended  
105 Data Fig. 5), the combined linker-motor compliance was very low such that we could pool  
106 all steps together (Fig. 1d). There were only a few 8-nm forward and some 4-nm, but  
107 hardly any 8-nm, backward steps (Extended Data Table 1). Thus, our data directly shows  
108 that kinesin walks with 4-nm centre-of-mass steps and that intermediate steps can sup-  
109 port load. Interestingly, for increasing forces, the step duration appeared to be alternating  
110 between a long and short dwell time that we denote by  $\tau_1$  and  $\tau_2$ , respectively (Fig. 1c).

111 Quantitatively, dwell time survival functions pooled from different force intervals were  
112 consistent with either a single exponential or sum of two exponentials with approximately  
113 equal amplitude for forces below or above 2 pN, respectively (Fig. 1e, Extended Data Ta-  
114 ble 1). Equal amplitudes imply that both type of dwells occurred equally often consistent  
115 with alternating steps having different properties. While the first dwell time  $\tau_1$  depended  
116 on force, the second one,  $\tau_2$ , hardly depended on force (blue and orange lines in top right  
117 inset Fig. 1e, see methods). The sum of the two dwell times  $\tau_{\text{cycle}}$  was consistent with  
118 a model based on the force-dependent speed of the motor (black circles and line in top  
119 right inset Fig. 1e, see methods) suggesting that each hydrolysis cycle is broken up into  
120 two mechanical substeps. Data recorded at low ATP concentrations (Fig. 2, see methods),  
121 show that only the first dwell time  $\tau_1$  that depended on force also depended on ATP while  
122  $\tau_2$ -values at low ATP hardly differed from the high-ATP values (Extended Data Table 1  
123 and 2). Furthermore, for forces larger than 3 pN and physiological ATP concentrations, for  
124 which we could clearly assign alternating steps, the step size of alternating steps, always  
125 measured after the dwell, did not differ significantly ( $\delta_1 = 4.03 \pm 0.06$  nm,  $N = 97$  and  
126  $\delta_2 = 3.94 \pm 0.06$  nm,  $N = 88$  for  $\tau_1$  and  $\tau_2$ , respectively, bottom left inset Fig. 1e). How-  
127 ever, we cannot rule out that the distributions consist of two closely spaced Gaussians with  
128 means that differ by the offset distance between neighboring protofilaments. Nevertheless,  
129 kinesin motors walked on average with 4-nm center-of-mass steps alternating in the force



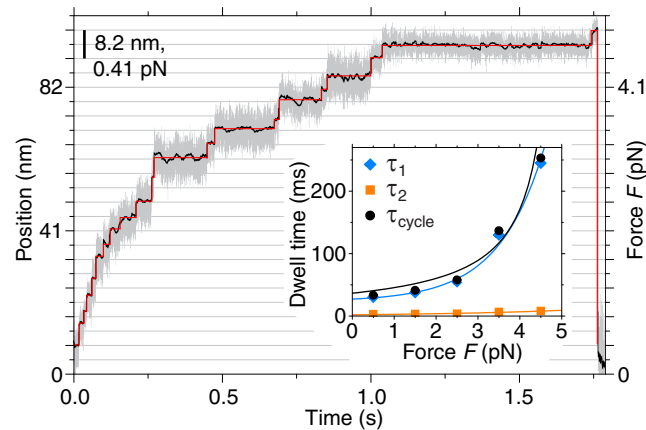

**Fig. 2 | Low-ATP-concentration kinesin trace.** Time trace for a single-kinesin powered GeNTOP at 10  $\mu$ M ATP (100 kHz bandwidth, grey trace; filtered data,  $\approx$ 100 Hz, black trace; detected steps, red line; see methods). Inset: Dwell times (symbols) with models (lines) versus force (see methods).

130 and ATP dependence of their dwell times.

### 131 **Kinesin detachment and motility rescue**

132 How and from which substep do motors detach? We noticed that in about 50% of the  
133 motility events ( $N = 149$ ), the last step—before the GeNTOP quickly returned to the trap  
134 centre—was a short substep (Fig. 1c, Extended Data Fig. 4). For the subsequent fast back-  
135 ward motion, we expected an exponential relaxation with a time constant corresponding  
136 to the trap response time  $\tau_{\text{trap}}$  in case of microtubule-motor detachment.<sup>8</sup> However, while  
137 the backward motion directed along the microtubule axis could be fitted by an exponential  
138 relaxation (red line in Fig. 3a), the average time constant  $\tau_{\parallel} = 295 \pm 9 \mu\text{s}$  ( $N = 149$ )—

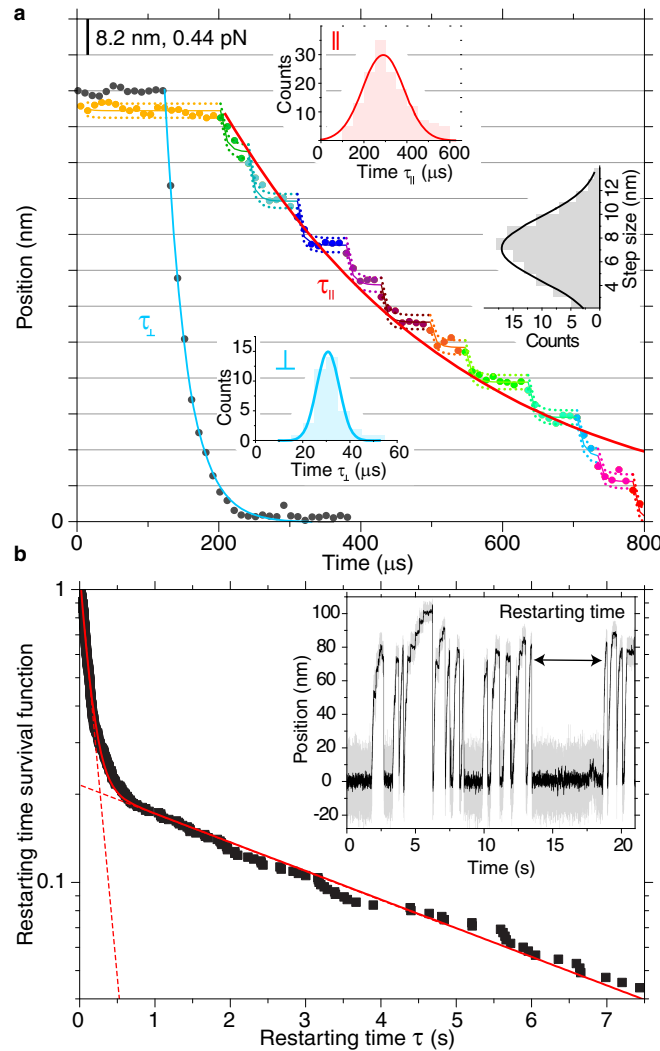

**Fig. 3 | Ultrafast steps and motility rescue.** **a**, Magnified time traces for a single-kinesin powered GeNTOP after the last step (grey and multicolored circles with or without side-ward load, respectively, 100 kHz bandwidth) with single exponential fits (blue and red line for motion perpendicular ( $\perp$ ) and parallel ( $\parallel$ ) to the microtubule axis, respectively). Multicolored lines correspond to states detected by a change-point algorithm<sup>31</sup> (dotted line 95% confidence interval). Inset: histograms with Gaussian fits (solid lines) of relaxation time constants  $\tau_{\parallel}$  and  $\tau_{\perp}$  (same color code as single exponential fits) and step size for detected states. **b**, Restarting-time distribution (squares) fitted with a sum of two exponentials (line with dashed line extrapolation,  $N = 550$ ). Inset: Illustration of the restarting time between consecutive kinesin motility events.

139 and all individual ones without exception—was much larger than the trap response time.  
140 This discrepancy suggests that the kinesin still interacted with the microtubule (Fig. 3a).  
141 To prevent microtubule interactions after the last step, we additionally pulled sideways  
142 on the kinesin-coated GeNTOP during motility events. With a load perpendicular to the  
143 microtubule axis, the relaxation time  $\tau_{\perp}$  after the last step was only  $30.7 \pm 0.8 \mu\text{s}$  ( $N =$   
144  $50$ ) consistent with the expected trap relaxation time in the proximity of the surface<sup>29</sup> and  
145 true motor detachment (Extended Data Fig. 6). Close inspection of the relaxation traces  
146 along the microtubule (without sideward loads) revealed steps occurring on a microsecond  
147 time scale that were robustly detected by an unbiased change-point detection algorithm<sup>31</sup>  
148 (Fig. 3a and further examples in Extended Data Fig. 7 and 8, see methods). Individual  
149 steps were composed of an exponential relaxation with a time constant of  $27 \pm 3 \mu\text{s}$  ( $N =$   
150  $20$ ) consistent with the trap relaxation time  $\tau_{\text{trap}}$  and had a step size of  $7.2 \pm 0.2 \text{ nm}$  ( $N =$   
151  $111$ ) close to the 8 nm repeat of the microtubule lattice (inset Fig. 3a) with a dwell time of  
152  $71 \pm 4 \mu\text{s}$  ( $N = 124$ ) averaged over all forces. Thus, we conclude that during fast backward  
153 motion, motors switched to a weakly bound slip state and remained in contact with the mi-  
154 crotubule lattice. To determine whether motors truly detached from this weakly bound  
155 state or whether motors could switch back to a motility-competent state, we analyzed the  
156 time between subsequent motility events that we call restarting time (inset Fig. 3b). In-  
157 triguingly, also the restarting time survival function was well described by a sum of two

158 exponentials having a time constant of  $112 \pm 1$  ms and  $4.1 \pm 0.4$  s, respectively (Fig. 3b).  
159 Two time constants imply that motility events started from two different states, possibly  
160 being *de novo* binding and the weakly bound state. The short restarting time constant that  
161 we measured is in excellent agreement with the one of a predicted weakly bound state  
162 prior to detachment of duration  $131 \pm 14$  ms.<sup>21</sup> Surprisingly,  $82 \pm 1$  % of our events had  
163 this short restarting time constant suggesting that most motors did not detach but motility  
164 was rescued from the weakly bound state.

165 Our data is consistent with a model for kinesin stepping that splits up the hydrolysis  
166 cycle into two mechanical substeps. In between the substeps, the motor can branch off  
167 from the normal hydrolysis pathway and switch to a weakly bound diffusive or sliding  
168 state prior to detachment or rescue of motility (Fig. 4). Overall, our model builds on and  
169 expands previous models.<sup>6,10,11,16,32</sup> Initially, both motor heads are bound to the micro-  
170 tubule with ADP and inorganic phosphate ( $P_i$ ) in the rear head and no nucleotide in the  
171 front one. With  $P_i$  release from the rear head and ATP binding to the other one, the rear  
172 neck linker is un- and the front one docked. This process triggers the first 4-nm, ATP-  
173 dependent centre-of-mass substep (Substep  $\tau_1(F,ATP)$  in Fig. 4). Since load is acting on  
174 the front neck linker during docking, it may explain that the dwell time of this step is also  
175 force dependent. Upon ATP hydrolysis in the front and ADP release from the rear head,  
176 the hydrolysis cycle is completed with a second 4-nm substep (Substep  $\tau_2$  in Fig. 4). Since

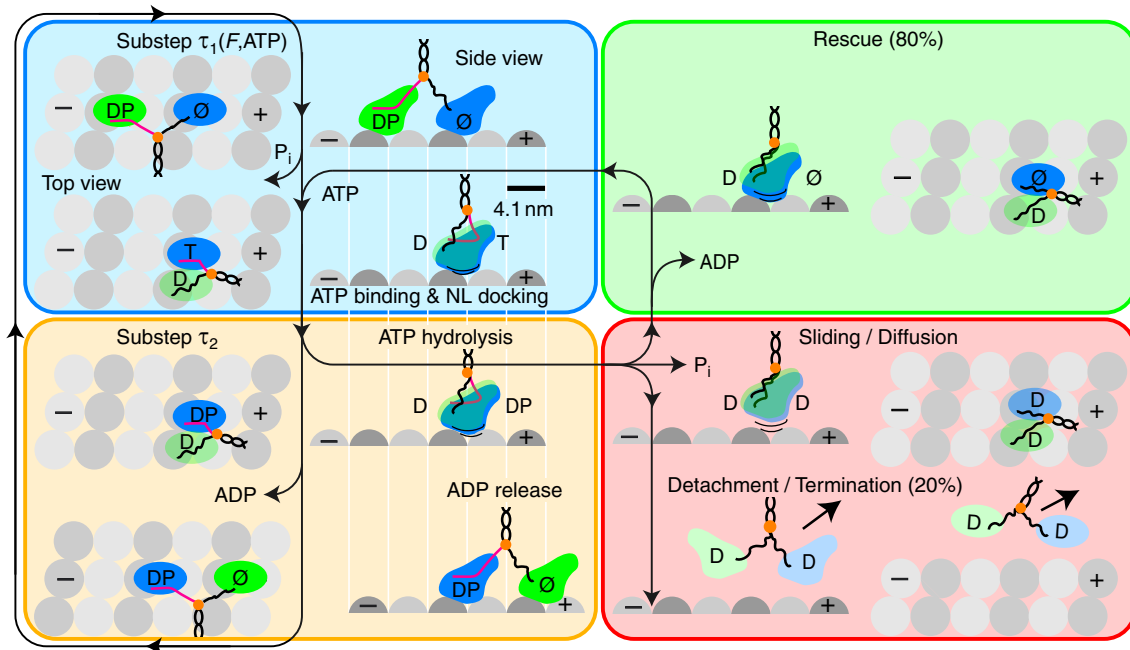

**Fig. 4 | Hydrolysis cycle with detachment and rescue.** Top and side view of kinesin with two identical heads (blue and green) stepping along a microtubule (grey spheres mark tubulin monomers). The hydrolysis cycle is divided into a force-dependent (blue box) and hardly force-dependent (orange box) substep with dwell times  $\tau_1(F, ATP)$  and  $\tau_2$ , respectively. Between these substeps, motors may switch to a weakly bound sliding or diffusive state from which motors either detach (red box) or motility is rescued (green box). The centre of mass is indicated by an orange circle, a docked neck linker (NL) marked by a magenta line, weak binding by lines underneath the heads, and nucleotide states by T: ATP, D: ADP, P: inorganic phosphate, and  $\emptyset$ : nucleotide free.

177 ATP is already bound, this substep does not depend on the ATP concentration. Also, be-  
178 cause load is mainly acting on the rear head through the docked neck linker and the front  
179 head is free to perform a diffusive search with an undocked neck linker, may explain why  
180 the dwell time of this step is hardly force dependent (inset Fig. 1e and Fig. 2). Based on  
181 previous<sup>6</sup> and our current data, we suggest that heads always remain weakly bound to the  
182 microtubule lattice likely due to electrostatic interactions, for example, with the negatively  
183 charge E-hooks of tubulin. If  $P_i$  is released from the front head directly after ATP hy-  
184 drolysis and before ADP is released from the rear head, both heads enter a weakly bound,  
185 diffusive ADP state interrupting the normal hydrolysis cycle (red box in Fig. 4). Load will  
186 bias such a diffusive state, as observed for the fast backward sliding motion after the last  
187 kinesin step when stalling, resulting in stepwise sliding motion opposed by hydrodynamic  
188 drag and protein friction.<sup>33</sup> The measured step size of these fast, sliding steps close to 8  
189 nm suggests that the motor heads interact primarily with the canonic kinesin-microtubule  
190 binding site. While we hardly observe 8-nm backward steps, we observed some short slip  
191 events (Extended Data Fig. 8). With a different force geometry and large microspheres  
192 that cause a large drag, such events may correspond to previously observed backward  
193 steps.<sup>14</sup> Protein friction allows us to estimate the diffusive step dwell time during the fast  
194 sliding motion. Based on the time constant for the fast movement back to the trap centre  
195  $\tau_{||} = \tau_{\text{trap}} + \gamma_{\text{protein friction}}/\kappa$ , the force-averaged friction coefficient  $\kappa$  due to friction between

196 the motor and its track is  $\gamma_{\text{protein friction}} \approx 15 \text{ nN s/m}$  and the corresponding diffusion coef-  
197 ficient according to the Einstein relation is  $D = k_B T / \gamma_{\text{protein friction}} \approx 0.3 \mu\text{m}^2/\text{s}$ , where  $k_B$   
198 is the Boltzmann constant and  $T$  the absolute temperature. Furthermore, if we model the  
199 backward movement by a biased one-dimensional random walk with a step size of  $\delta =$   
200  $8 \text{ nm}$ , the expected average step time is  $\tau \approx \delta^2 / (2D) \approx 70 \mu\text{s}$ . This time constant is in  
201 excellent agreement with the directly measured dwell time during the fast backward slid-  
202 ing motion (Fig. 3a) and supports the notion of a biased weakly bound slip state prior to  
203 detachment or rescue.<sup>21</sup> Unexpectedly, in only roughly 20 % of events, motors did truly  
204 detach, but in 80 % of the cases ADP must have dissociated from one of the heads rescuing  
205 directed motion. We expect that motors also switch to this diffusive state when no load  
206 is applied, suggesting that overall run lengths of motors are concatenations of processive  
207 runs interrupted by short diffusive periods.<sup>34,35</sup>

208 Relative to the benchmark,<sup>7</sup> the spatiotemporal resolution  $\delta\sqrt{\tau}$  of the fast 8-nm steps  
209 on microsecond time scales, is an improvement by a factor of about  $4.5\times$  and  $20\times$  with  
210 respect to spatial and temporal resolution (Extended Data Fig. 9). Thus, GeNTOPs do al-  
211 low to observe molecular machines at their native spatiotemporal resolution. In our case,  
212 the dwell time of the weakly bound state cannot be slowed down by reducing nucleotide  
213 concentrations because nucleotides likely did not exchange during sliding. For kinesins,  
214 the detachment and rescue state allows motors to slide back to their team during transport

215 with direct reengagement in motility. This process provides a route for load distribution  
216 and motor synchronization enhancing transport. Therefore, for a better understanding  
217 of long-range transport in crowded cells<sup>19</sup> and, in general, other essential cellular func-  
218 tions of kinesins, the sliding and rescue processes need to be accounted for. GeNTOPs  
219 not only break limits in optical trapping, but open up many other opportunities due to  
220 having the highest infrared refractive index of common materials and being a semiconduc-  
221 tor. Germanium nanospheres are a lower-toxicity alternative to compound semiconductor  
222 nanoparticles,<sup>22,24</sup> optimal for bioimaging and sensing at wavelengths biological tissues  
223 are transparent,<sup>23</sup> promising candidates for other applications in nanophotonics and op-  
224 toelectronics,<sup>25,26</sup> and may enhance energy harvesting and storage.<sup>36</sup> Widely available,  
225 size-controllable high-refractive index nanospheres will pave the way for many new dis-  
226 coveries and technologies.

- 227 1. Svoboda, K. & Block, S. M. Biological applications of optical forces. *Annu. Rev.*  
228 *Biophys. Biomol. Struct.* **23**, 247–285 (1994).
- 230 2. Moffitt, J. R., Chemla, Y. R., Smith, S. B. & Bustamante, C. Recent advances in  
231 optical tweezers. *Annu. Rev. Biochem.* **77**, 205–228 (2008).
- 232 3. Gennerich, A. *Optical Tweezers*. Methods Mol. Biol. (Springer, New York, 2017).



- 233 4. Ashkin, A., Dziedzic, J. M., Bjorkholm, J. E. & Chu, S. Observation of a single-beam  
234 gradient force optical trap for dielectric particles. *Opt. Lett.* **11**, 288–290 (1986).
- 235 5. Gittes, F. & Schmidt, C. F. Signals and noise in micromechanical measurements. In  
236 Sheetz, M. P. (ed.) *Methods Cell Biol.*, vol. 55, 129–156 (Academic Press, 1997).
- 237 6. Ramaiya, A., Roy, B., Bugiel, M. & Schäffer, E. Kinesin rotates unidirectionally and  
238 generates torque while walking on microtubules. *Proc. Natl. Acad. Sci. USA* **114**,  
239 10894–10899 (2017).
- 240 7. Abbondanzieri, E. A., Greenleaf, W. J., Shaevitz, J. W., Landick, R. & Block, S. M.  
241 Direct observation of base-pair stepping by RNA polymerase. *Nature* **438**, 460–465  
242 (2005).
- 243 8. Howard, J. *Mechanics of motor proteins and the cytoskeleton* (Sinauer Associates,  
244 Sunderland, MA, 2001).
- 245 9. Svoboda, K., Schmidt, C. F., Schnapp, B. J. & Block, S. M. Direct observation of  
246 kinesin stepping by optical trapping interferometry. *Nature* **365**, 721–727 (1993).
- 247 10. Hancock, W. O. The Kinesin-1 Chemomechanical Cycle: Stepping Toward a Con-  
248 sensus. *Biophys. J.* **110**, 1216–1225 (2016).

- 249 11. Cross, R. A. Review: Mechanochemistry of the kinesin-1 ATPase. *Biopolymers* **105**,  
250 476–482 (2016).
- 251 12. Coppin, C. M., Finer, J. T., Spudich, J. A. & Vale, R. D. Detection of sub-8-nm  
252 movements of kinesin by high-resolution optical-trap microscopy. *Proc. Natl. Acad.*  
253 *Sci. U. S. A.* **93**, 1913–1917 (1996).
- 254 13. Nishiyama, M., Muto, E., Inoue, Y., Yanagida, T. & Higuchi, H. Substeps within the  
255 8-nm step of the ATPase cycle of single kinesin molecules. *Nat. Cell Biol.* **3**, 425–428  
256 (2001).
- 257 14. Carter, N. J. & Cross, R. A. Mechanics of the kinesin step. *Nature* **435**, 308–312  
258 (2005).
- 259 15. Block, S. M. Kinesin motor mechanics: Binding, stepping, tracking, gating, and  
260 limping. *Biophys. J.* **92**, 2986–2995 (2007).
- 261 16. Mickolajczyk, K. J. *et al.* Kinetics of nucleotide-dependent structural transitions in  
262 the kinesin-1 hydrolysis cycle. *Proc. Natl. Acad. Sci. USA* **112**, E7186–E7193 (2015).
- 263 17. Isojima, H., Iino, R., Niitani, Y., Noji, H. & Tomishige, M. Direct observation of  
264 intermediate states during the stepping motion of kinesin-1. *Nat. Chem. Biol.* **12**,  
265 290–297 (2016).

- 266 18. Hendricks, A. G. *et al.* Motor coordination via a tug-of-war mechanism drives bidi-  
267 rectional vesicle transport. *Curr. Biol.* **20**, 697–702 (2010).
- 268 19. Feng, Q., Mickolajczyk, K. J., Chen, G.-y. & Hancock, W. O. Motor reattachment  
269 kinetics play a dominant role in multimotor-driven cargo transport. *Biophys. J.* **114**,  
270 400–409 (2018).
- 271 20. Schimert, K. I., Budaitis, B. G., Reinemann, D. N., Lang, M. J. & Verhey, K. J.  
272 Intracellular cargo transport by single-headed kinesin motors. *Proc. Natl. Acad. Sci.*  
273 *USA* **116**, 6152–6161 (2019).
- 274 21. Khataee, H. & Howard, J. Force generated by two kinesin motors depends on the load  
275 direction and intermolecular coupling. *Phys. Rev. Lett.* **122**, 188101 (2019).
- 276 22. Fan, J. & Chu, P. K. Group IV nanoparticles: Synthesis, properties, and biological  
277 applications. *Small* **6**, 2080–2098 (2010).
- 278 23. Vaughn II, D. D. & Schaak, R. E. Synthesis, properties and applications of colloidal  
279 germanium and germanium-based nanomaterials. *Chem. Soc. Rev.* **42**, 2861–2879  
280 (2013).
- 281 24. Guo, Y. J. *et al.* Facile synthesis of multifunctional germanium nanoparticles as a  
282 carrier of quercetin to achieve enhanced biological activity. *Chem. Asian J.* **9**, 2272–  
283 2280 (2014).

- 284 25. Kuznetsov, A. I., Miroshnichenko, A. E., Brongersma, M. L., Kivshar, Y. S. &  
285 Luk'yanchuk, B. Optically resonant dielectric nanostructures. *Science* **354**, aag2472  
286 (2016).
- 287 26. Krasnok, A., Caldarola, M., Bonod, N. & Alú, A. Spectroscopy and biosensing with  
288 optically resonant dielectric nanostructures. *Adv. Opt. Mater.* **6**, 1701094 (2018).
- 289 27. Mahamdeh, M. & Schäffer, E. Optical tweezers with millikelvin precision of  
290 temperature-controlled objectives and base-pair resolution. *Opt. Express* **17**, 17190  
291 (2009).
- 292 28. Tolic-Nørrelykke, S. F., Schäffer, E., Howard, J., Pavone, F. S. & Jülicher, F. Cali-  
293 bration of optical tweezers with positional detection in the back focal plane. *Rev. Sci.*  
294 *Instrum.* **77**, 103101 (2006).
- 295 29. Schäffer, E., Nørrelykke, S. F. & Howard, J. Surface forces and drag coefficients  
296 of microspheres near a plane surface measured with optical tweezers. *Langmuir* **23**,  
297 3654–3665 (2007).
- 298 30. Simmert, S., Abdosamadi, M., Hermsdorf, G. & Schäffer, E. LED-based  
299 interference-reflection microscopy combined with optical tweezers for quantitative  
300 three-dimensional microtubule imaging. *Opt. Express* **26**, 1437–1448 (2018).

- 301 31. Wiggins, P. A. An information-based approach to change-point analysis with applica-  
302 tions to biophysics and cell biology. *Biophys. J.* **109**, 346–354 (2015).
- 303 32. Andreasson, J. O. L. *et al.* Examining kinesin processivity within a general gating  
304 framework. *eLife* **21**, 1–22 (2015).
- 305 33. Bormuth, V., Varga, V., Howard, J. & Schäffer, E. Protein friction limits diffusive  
306 and directed movements of kinesin motors on microtubules. *Science* **325**, 870–874  
307 (2009).
- 308 34. Jannasch, A., Bormuth, V., Storch, M., Howard, J. & Schäffer, E. Kinesin-8 is a  
309 low-force motor protein with a weakly bound slip state. *Biophys. J.* **104**, 2456–2464  
310 (2013).
- 311 35. Chugh, M. *et al.* Phragmoplast orienting kinesin 2 is a weak motor switching between  
312 processive and diffusive modes. *Biophys. J.* **115**, 375–385 (2018).
- 313 36. Kim, T. H., Song, H. K. & Kim, S. Production of germanium nanoparticles via laser  
314 pyrolysis for anode materials of lithium-ion batteries and sodium-ion batteries. *Nan-*  
315 *otechnology* **30**, 275603 (2019).
- 316 37. Jannasch, A., Mahamdeh, M. & Schäffer, E. Inertial effects of a small brownian  
317 particle cause a colored power spectral density of thermal noise. *Phys. Rev. Lett.* **107**,  
318 228301 (2011).

319 **Methods**

320 **Synthesis of germanium nanospheres (GeNTOPs)** The germanium nanospheres were  
321 synthesized in an aqueous solution advancing a method of Guo *et al.*<sup>24</sup> As substrate,  
322 17.0 mg of germanium oxide (GeO<sub>2</sub>) and 96.0 mg of quercetin, acting as a stabilizing  
323 agent, were dissolved in 10 ml of a 0.15 M sodium hydroxide solution each and then mixed  
324 together while stirring for 10 min and adjusting the pH to 8.8 via titration with 37 % HCl  
325 (Solution A). Subsequently, 29.5 mg of sodium borohydride (NaBH<sub>4</sub>, reducing agent) was  
326 dissolved as quickly as possible in 3 ml of 4 °C-cold water and stored in a refrigerator  
327 at 4 °C (Solution B). Then, Solution A was stirred continuously in a preheated oil bath  
328 at 60 °C for 10 min and Solution B was added dropwise. The reaction was stopped after  
329 5 h and GeNTOPs washed thrice thoroughly with water by centrifuging the sample at  
330 13,000 rpm. All chemicals were purchased from Sigma Aldrich and used without further  
331 purification unless noted otherwise. Purified Type 1 water was used for all experiments  
332 (18.2 MΩ cm, Nanopure System MilliQ reference with Q-POD and Biopak filter). The  
333 size characterization analysis was done using a TEM-Jeol 1400 plus transmission electron  
334 microscope. About 10 μl of the GeNTOP solution was sonicated and subsequently 5 μl  
335 spotted on a TEM grid. Dynamic light scattering resulted in a diameter of 74 ± 3 nm  
336 consistent with the value obtained by TEM.

337 **Lipid-bilayer functionalization of GeNTOPs** After the synthesis, GeNTOPs were coated  
338 with a lipid bilayer using established methods.<sup>38-40</sup> Briefly, 1,2-dimyristoyl-sn-glycero-  
339 3-phosphocholine (DMPC, Avanti Polar Lipids, Inc.) and 1,2-distearoyl-sn-glycero-3-  
340 phosphoethanolamine-N-[carboxy(polyethylene glycol)-2000] (DSPE-COOH, Avanti Po-  
341 lar Lipids, Inc.) were dissolved in chloroform (10 mg/ml). Aliquots of a 4:1 molar ra-  
342 tio mixture of these lipids were dried overnight in a desiccator at 50 mbar and stored  
343 at  $-20^{\circ}\text{C}$ . The dried lipid mixture was hydrated by adding 1 ml of  $80^{\circ}\text{C}$  warm buffer  
344 (10 mM 4-(2-hydroxyethyl)-1-piperazineethanesulfonic acid (HEPES), 150 mM NaCl, pH  
345 7.4) resulting in a final total lipid concentration of about 0.5 mM. To form multilamellar  
346 vesicles (MLVs), the solution was mixed thoroughly by pipetting and vortexed for 2 min.  
347 Subsequently, small unilamellar vesicles (SUVs) were formed by sonicating the MLV mix-  
348 ture for 30 min at  $80^{\circ}\text{C}$ . The sonicated solution was centrifuged at 12,000 rpm for 15 min  
349 and SUVs collected from the supernatant. Then, equal volumes of GeNTOP and SUV  
350 solutions were mixed. To induce fusion of the liposomes onto the GeNTOPs,  $\text{CaCl}_2$  was  
351 added to the mixture (3 mM final concentration) that was incubated for 45 min at  $80^{\circ}\text{C}$  in  
352 a thermomixer using a shaking speed of 600 rpm. The membrane-coated GeNTOPs were  
353 washed thrice in three different buffers, first with Buffer 1 (25 mM HEPES, 200 mM NaCl,  
354 1 mM tris(2-carboxyethyl)phosphine (TCEP), pH 7.4, 5 mM EDTA) followed by washing  
355 them in Buffer 2 (25 mM HEPES, pH 7.4, 100 mM NaCl, 0.25 mM  $\text{CaCl}_2$ ) and then in

356 Buffer 3 (25 mM HEPES, pH 7.4, 25 mM NaCl, 1 mM TCEP, 0.25 mM CaCl<sub>2</sub>). After  
357 each wash, GeNTOPs were collected by spinning the sample at 13,000 rpm for 15 min and  
358 gently resuspending them. After the last resuspension step, GeNTOPs were lyophilized  
359 and kept at 4 °C for later use. For membrane visualization, 10 µl of 2 µM DiI lipophilic dye  
360 was added when hydrating the lipid mixture used to coat GeNTOPs. As a control, 100 µl  
361 of uncoated GeNTOPs, was mixed with 10 µl of 2 µM DiI lipophilic dye and incubated for  
362 45 min. After incubation, these GeNTOPs were washed thrice with water and suspended  
363 in 100 µl water. Both the coated GeNTOPs with the membrane dye and control GeNTOPs  
364 were imaged by a Leica TCS SP8 confocal microscope with an excitation wavelength of  
365 565 nm. No fluorescence was observed for the control.

366 **GeNTOP PEGylation and nanobody coupling** For kinesin experiments, we PEGylated  
367 GeNTOPs and covalently bound GFP nanobodies to them as described previously<sup>41</sup> with  
368 some modifications. About 0.1 g of lyophilized GeNTOPs were dissolved in 1 ml water.  
369 From this stock, 25 µl were washed twice with 975 µl of 2-(N-morpholino)ethanesulfonic  
370 acid (MES) buffer (50 mM, pH = 6.0) by centrifuging GeNTOPs at 13,000 rpm for 15 min.  
371 Before each wash cycle, GeNTOPs were vortexed and sonicated in a bath sonicator for  
372 15 s. Then, GeNTOPs were resuspended in 250 µl MES buffer. After washing, GeNTOPs  
373 were vortexed and sonicated for 180 s. Then, 16.4 mg of 1-(3-(dimethylamino)propyl)-3-  
374 ethylcarbodiimide hydrochloride (EDC) and 8.3 mg of N-hydroxysulfosuccinimide sodium



375 (NHS) were dissolved in 100  $\mu$ l of MES buffer. From the prepared solution, 9  $\mu$ l of NHS  
376 and 15.8  $\mu$ l of EDC were added to the resuspended GeNTOPs and the solution was mixed  
377 in a thermomixer for 15 min at 37 °C. Then, GeNTOPs were washed twice with 500  $\mu$ l of  
378 MES buffer, resuspended in 240  $\mu$ l of PBS-T (phosphate buffer saline supplemented with  
379 0.1 % Tween 20), and vortexed and sonicated for 90 s. Subsequently, GFP-nanobodies<sup>42</sup>  
380 (13 kDa, gift of Ulrich Rothbauer, NMI, Reutlingen, Germany) and 2 kDa  $\alpha$ -methoxy- $\omega$ -  
381 amino PEG (Rapp Polymere, Tübingen, Germany) in a molar ratio of 1:1000 were coupled  
382 covalently to the GeNTOPs by incubating them in a thermomixer for 1 h at 600 rpm and  
383 37 °C. Afterwards, GeNTOPs were washed five times with PBS-T and stored at 4 °C.

384 **Sample preparation and assay** Experiments were performed in flow cells that were  
385 constructed using silanized, hydrophobic glass cover slips and parafilm as described be-  
386 fore<sup>29,33</sup> but chlorotrimethylsilane (Merck Millipore, Burlington, MA) was used to render  
387 surfaces hydrophobic. Truncated kinesin1-eGFP-6xHis (rk430) was purified as described  
388 previously.<sup>6,33</sup> Taxol-stabilized microtubules, sometimes additionally 10% rhodamine-  
389 labeled, were prepared as described previously.<sup>43</sup> Flow channels were washed with PEM  
390 buffer (80 mM 1,4-piperazinediethanesulfonic acid (PIPES), 1 mM EGTA, 1 mM MgCl<sub>2</sub>,  
391 adjusted with KOH to pH 6.9), filled and incubated successively with anti  $\beta$ -tubulin I  
392 (monoclonal antibody SAP.4G5 from Sigma in PEM) for 15–20 min, Pluronic F-127 (1 %  
393 in PEM) for 20 min, and microtubules in PEM for 15 min. Kinesin with a stock concen-

394 tration of 12.1 mg/ml was diluted 1000 $\times$  in motility buffer (PEM with 0.16 mg/ml casein,  
395 1 mM or 10  $\mu$ M ATP and an anti-fade cocktail [20 mM D-glucose, 0.02 mg/ml glucose  
396 oxidase, 0.008 mg/ml catalase and 10 mM dithiothreitol]). Then 4  $\mu$ l of the kinesin so-  
397 lution was mixed with 96  $\mu$ l of 10 $\times$  diluted functionalized GeNTOPs and incubated for  
398 10 min. About, 20  $\mu$ l of this GeNTOP-motility solution was flown into the channel for  
399 single-molecule force measurements. To rule out artifacts from angled motion in the opti-  
400 cal trap,<sup>44</sup> only microtubules aligned with the flow cell channel direction and perpendicular  
401 to the laser polarization<sup>45</sup> were chosen for experiments.

402 **Optical tweezers setup and calibration** Measurements were performed in our ultrapreci-  
403 sion optical tweezers setup.<sup>27,29</sup> Briefly, the setup has near- $\text{\AA}$  resolution in surface-coupled  
404 assays (Extended Data Fig. 1) and is equipped with a millikelvin precision temperature  
405 control set to 29.500  $^{\circ}\text{C}$ .<sup>27</sup> Signals of a 1064 nm trapping laser were recorded with 100 kHz  
406 by back focal plane detection. The optical trap was calibrated by a combined power spec-  
407 tral density–drag force method.<sup>28,29</sup> The average trap stiffness used for experiments was  
408 about 0.05 pN/nm. For the power spectra in Extended Data Fig. 2, the trap stiffness was  
409  $0.0552 \pm 0.0005$  pN/nm and  $0.0561 \pm 0.0005$  pN/nm recorded at 2  $\mu$ m and 5  $\mu$ m distance  
410 from the surface using about 600 mW and 6.5 mW of laser power in the focus for the  
411 GeNTOP and polystyrene microsphere, respectively. Both trap stiffness values quantita-  
412 tively agreed with Mie theory calculations for our setup<sup>45–47</sup> using a refractive index of

413  $4.4 + 0.11i$  for the GeNTOPs. Due to absorption, we measured a temperature increase  
414 for the GeNTOPs at 600 mW trapping power of about 7 K above the flow cell temperature  
415 500 nm away from the surface using our calibration method.<sup>37</sup> This temperature increase  
416 is slightly more than what is expected for heating due to the trapping laser alone.<sup>49</sup> Since  
417 the surface acts as a heat sink,<sup>49</sup> we expect that during kinesin experiments heating was  
418 less. We did not notice any significant changes due to temperature, e.g. in motor speed  
419 or force generation, compared to when using polystyrene microspheres with the same trap  
420 stiffness.

421 **Step detection and data processing** For step detection and filtering, data was processed  
422 using an optimized, automated step finding algorithm<sup>50</sup> based on a modified forward-and-  
423 backward filter from Chung & Kennedy that we implemented in Python<sup>33, 50-52</sup>. The filter  
424 works very efficiently in particular, for large data sets consisting of millions of data points.  
425 For sufficiently large data sets, the algorithm automatically finds the optimal window  
426 length for filtering and step detection according to the following idea: if we smooth the sig-  
427 nal with different window lengths, the standard deviation of the smoothed signal de-  
428 creases with increasing window length as long as the window length is shorter than the  
429 dwell time of the steps. As soon as the window includes steps, i.e. is comparable to  
430 the dwell time of the steps, the standard deviation increases again. The window length  
431 with the lowest standard deviation is used as a proxy for the optimal window size that we

432 empirically chose to be 4/5 of the latter window length. To filter the data while preserving  
433 steps, the optimal window size is used to calculate the variance-weighted mean of the for-  
434 ward and backward window corresponding to the filtered data point. For our data, we used  
435 a window size of 4.8 ms. For step detection during the fast backward motion, we used  
436 the unbiased “Steppi” algorithm.<sup>31</sup> In selected traces (Extended Data Fig. 7), the algo-  
437 rithm detected steps corresponding to single exponential relaxations with a time constant  
438 consistent with the trap response time. To robustly detect sliding steps in many traces, we  
439 fixed the relaxation time constant to the expected and exemplarily verified one. To account  
440 for the different trap response times in the different directions parallel and perpendicular  
441 to the microtubule axis and assuming that the hydrodynamic drag coefficient is the same  
442 in both directions,<sup>29</sup> we chose a relaxation time of  $\tau_{\perp} \kappa_{\perp} / \kappa_{\parallel} = 25 \mu\text{s}$ , where  $\kappa_{\parallel}$  and  $\kappa_{\perp}$  are  
443 the trap stiffness in the direction of the microtubule axis and perpendicular to it, respec-  
444 tively, and  $\tau_{\perp}$  is the experimentally measured value (Fig. 3a). The average trap stiffness of  
445  $\kappa_{\parallel}$  and  $\kappa_{\perp}$  was  $0.051 \pm 0.001 \text{ pN/nm}$  ( $N = 149$ ) and  $0.041 \pm 0.001 \text{ pN/nm}$  ( $N = 50$ ). To  
446 apply sideward loads during a motility event, we manually displaced the sample 50 nm in  
447 a direction perpendicular to the microtubule axis and relative to the stationary optical trap  
448 using a piezo-translation stage resulting in sideward loads of about 2 pN. For the last short  
449 step, we measured a dwell time of  $58 \pm 12 \text{ ms}$  ( $N = 74$ ) longer than the average  $\tau_2$  value  
450 at that force indicating that the small increase of  $\tau_2$  with force promotes the switching to

451 the diffusive state. Speeds as a function of force are based on linear fits to trace segments  
452 in the respective force intervals, where automatic threshold detection of force was based  
453 on the filtered data. The speed (Extended Table 1 and 2) was well described by a linear  
454 force-velocity relation with zero-load speed  $v_0 = 0.64 \pm 0.02 \mu\text{m/s}$  and  $0.22 \pm 0.02 \mu\text{m/s}$   
455 and stall force  $F_s = 4.92 \pm 0.03 \text{ pN}$  and  $5.1 \pm 0.7 \text{ pN}$  for high and low ATP concentrations,  
456 respectively. Based on this relation and fitted parameters, the total dwell time for a hydroly-  
457 ysis cycle is  $\tau_{\text{cycle}} = (2\delta)/(v_0(1 - F/F_s))$  (black line in top right inset Fig. 1e and inset  
458 Fig. 2), where we used  $\delta = 4.1 \text{ nm}$ . The force dependence of the substeps was modeled by  
459  $\tau(F) = \tau_0 \exp(Fx^\ddagger/(k_B T)) + \tau_{\text{const}}$ , where for 1 mM ATP and the long dwell time  $\tau_1$  the  
460 zero-force dwell time  $\tau_0$  was  $0.5 \pm 0.2 \text{ ms}$ , the distance to the transition state  $x^\ddagger$  was  $5.3$   
461  $\pm 0.4 \text{ nm}$ , and the constant  $\tau_{\text{const}}$  was  $7 \pm 2 \text{ ms}$  (blue line in top right inset Fig. 1e). For  
462 1 mM ATP and the short dwell time  $\tau_2$ , the data was best modeled by a constant value of  
463  $6.0 \pm 1.6 \text{ ms}$  (orange line in top right inset Fig. 1e). Note that for  $F < 2 \text{ pN}$ , a single ex-  
464 ponential modeled the data best and we used the same value for  $\tau_1$  and  $\tau_2$ . For 10  $\mu\text{M}$  ATP,  
465 the zero-force dwell time  $\tau_0$  was  $4 \pm 2 \text{ ms}$  and  $2.1 \pm 0.4 \text{ ms}$ , the distance to the transition  
466 state  $x^\ddagger$  was  $3.8 \pm 0.6 \text{ nm}$  and  $1.2 \pm 0.3 \text{ nm}$ , and the offset  $\tau_{\text{const}}$  was  $24 \pm 6 \text{ ms}$  and zero  
467 for  $\tau_1$  and  $\tau_2$ , respectively (blue and orange line in inset Fig. 2).

468 **Single-molecule conditions** We measured the fraction of motile GeNTOPs  $p_m \pm (p_m(1 -$   
469  $p_m)/N)^{1/2}$  (mean  $\pm$  error bar) by trapping GeNTOPs incubated with different concen-

470 trations of kinesin motors and placing them on microtubules to await motility.<sup>41,53</sup> The  
471 probability that a single motor transported the GeNTOP is  $p_1 = (1 - p_m)(1 - \ln(1 - p_m))$   
472 not accounting for that a motor, bound opposite to another one, may not be able to interact  
473 simultaneously. For single-molecule experiments, the pipetted kinesin-to-GeNTOP ratio  
474 was about 20 corresponding to a motile fraction of  $p_m \lesssim 30\%$  implying single-molecule  
475 conditions with at least 95% confidence. To measure speed and run length of single ki-  
476 nesin motors on microtubules in the absence of loads, we used another custom-built optical  
477 tweezers setup combined with interference reflection microscopy (IRM).<sup>30</sup> Motor-coated  
478 GeNTOPs were trapped and placed on a microtubule. If the GeNTOP showed motility, the  
479 trap was turned off and IRM images were acquired at a rate of 7 frames/s (for an example,  
480 see Supplementary Video 1). Based on kymographs, the mean motor speed and run length  
481 was  $0.72 \pm 0.05 \mu\text{m/s}$  and  $1.1 \pm 0.4 \mu\text{m}$  ( $N = 12$ ), respectively, consistent with literature  
482 values.<sup>54–56</sup>

483 **Data availability** The data that support the findings of this study are available from the  
484 authors on reasonable request.

485

486 38. Ma, L., Cai, Y., Li, Y., Jiao, J. & Wu, Z. Single-molecule force spectroscopy of  
487 protein-membrane interactions. *elife* **6**, 1–21 (2017).

488 39. Santhosh, P. B., Thomas, N., Sudhakar, S., Chadha, A. & Mani, E. Phospholipid  
489 stabilized gold nanorods: towards improved colloidal stability and biocompatibility.  
490 *Phys. Chem. Chem. Phys.* **19**, 18494–18504 (2017).

491 40. Brouwer, I. *et al.* Direct quantitative detection of Doc2b-induced hemifusion in opti-  
492 cally trapped membranes. *Nat. Commun.* **6**, 1–8 (2015).

493 41. Bugiel, M. *et al.* Versatile microsphere attachment of GFP-labeled motors and other  
494 tagged proteins with preserved functionality. *J. Biol. Methods* **2**, 30 (2015).

495 42. Rothbauer, U. *et al.* A versatile nanotrap for biochemical and functional studies with  
496 fluorescent fusion proteins. *Mol. Cell Proteomics.* **7**, 282–289 (2008).

497 43. Bugiel, M., Böhl, E. & Schäffer, E. The kinesin-8 Kip3 switches protofilaments in a  
498 sideward random walk asymmetrically biased by force. *Biophys. J.* **108**, 2019–2027  
499 (2015).

- 500 44. Bugiel, M., Jannasch, A. & Schäffer, E. Implementation and tuning of an optical  
501 tweezers force-clamp feedback system. In Gennerich, A. (ed.) *Optical Tweezers:  
502 Methods and Protocols*, chap. 5, 109–136 (Humana Press, 2016).
- 503 45. Mahamdeh, M., Campos, C.P & Schäffer, E. Under-filling trapping objectives opti-  
504 mizes the use of the available laser power in optical tweezers. *Opt. Express* **19**, 11759  
505 (2011).
- 506 46. Nieminen, T. A. *et al.* Optical tweezers computational toolbox. *J. Opt. A: Pure Appl.  
507 Opt.* **9**, 196–203 (2007).
- 508 47. Bormuth, V. *et al.* Optical trapping of coated microspheres. *Opt. Express* **16**, 13831–  
509 13844 (2008).
- 510 48. Jannasch, A., Mahamdeh, M. & Schäffer, E. Inertial effects of a small brownian  
511 particle cause a colored power spectral density of thermal noise. *Phys. Rev. Lett.* **107**,  
512 228301 (2011).
- 513 49. Peterman, E. J. G., Gittes, F. & Schmidt, C. F. Laser-induced heating in optical traps.  
514 *Biophys. J.* **84**, 1308–1316 (2003).
- 515 50. Jachowski, T. J. Stepfinder: A Python package to find steps in one dimensional  
516 data with low SNR. GitHub repository: [https://github.com/tobiasjj/  
517 stepfinder](https://github.com/tobiasjj/stepfinder) (2019).



- 518 51. Chung, S. H. & Kennedy, R. A. Forward-backward non-linear filtering technique for  
519 extracting small biological signals from noise. *J. Neurosci. Methods* **40**, 71–86 (1991).
- 520 52. Smith, D. A. A quantitative method for the detection of edges in noisy time-series.  
521 *Philos. Trans. R. Soc. B* **353**, 1969–1981 (1998).
- 522 53. Svoboda, K. & Block, S. M. Force and velocity measured for single kinesin molecules.  
523 *Cell* **77**, 773–784 (1994).
- 524 54. Block, S., Goldstein, L. & Schnapp, B. Bead movement by single kinesin molecules  
525 studied with optical tweezers. *Nature* **348**, 348–352 (1990).
- 526 55. Coy, D. L., Wagenbach, M. & Howard, J. Kinesin takes one 8-nm step for each ATP  
527 that it hydrolyzes. *J. Biol. Chem.* **274**, 3667–3671 (1999).
- 528 56. Cai, D., Verhey, K. J. & Meyhöfer, E. Tracking single kinesin molecules in the cyto-  
529 plasm of mammalian cells. *Biophys. J.* **92**, 4137–4144 (2007).

530 **Acknowledgements** We thank Ulrich Rothbauer (NMI, Reutlingen, Germany) for providing the  
531 anti-GFP nanobody, Andreas Schnepf for the use of the Zetasizer, and Mohammed Mahamdeh, Joe  
532 Howard, Martin Oettel, and Carolina Carrasco for comments on the manuscript. This work was  
533 supported by the interdisciplinary “nanoBCP-Lab” funded by the Carl Zeiss Foundation (Forschungsstruk-  
534 turprogramm 2017), the German Research Foundation (DFG, JA 2589/1-1, CRC1011, project

535 A04), the Institutional Strategy of the University of Tübingen (Deutsche Forschungsgemeinschaft,  
536 ZUK 63), and the PhD Network “Novel Nanoparticles” of the Universität Tübingen.

537 **Author contributions** S.S., and E.S. designed research; S.S. performed all experiments; S.S.,  
538 M.K.A., A.J. and E.S. analysed data; M.K.A and T.J.J. provided data analysis software; T.J.J.  
539 developed the Python package stepfinder; M.B. and A.J. developed protocols, controlled statistics,  
540 and provided advice; and S.S., and E.S. wrote the paper. All authors commented on the manuscript.

541 **Author Information** The authors declare that they have no competing financial interests. Corre-  
542 spondence and requests for materials should be addressed to E.S. ([erik.schaeffer@uni-tuebingen.de](mailto:erik.schaeffer@uni-tuebingen.de)).

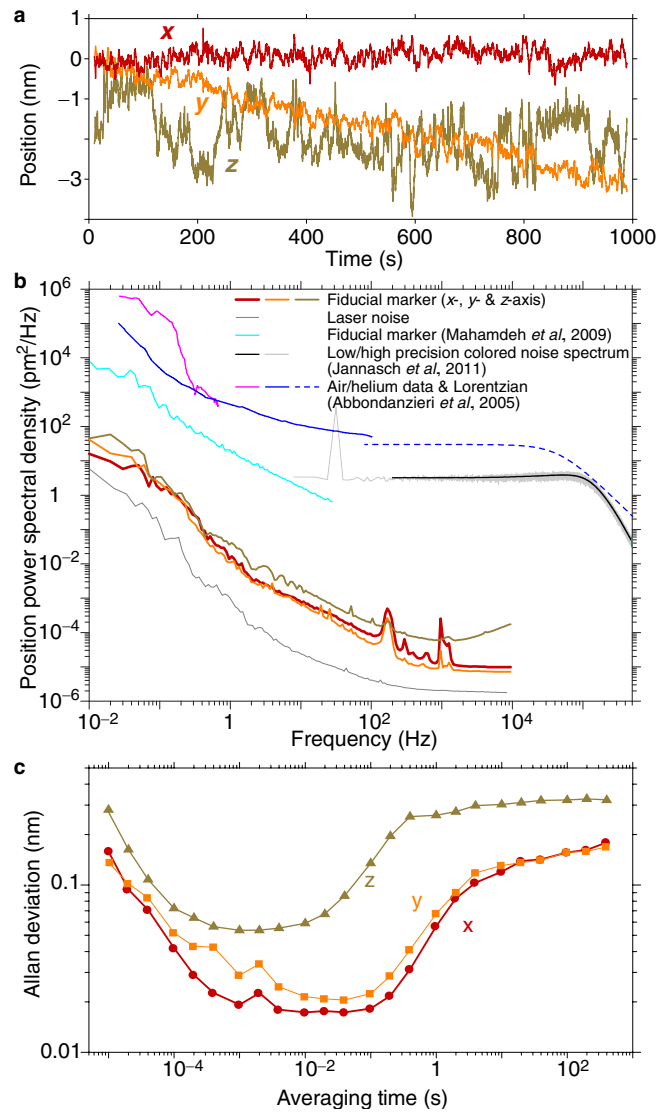

**Extended Data Fig. 1 | Ultrastable optical tweezers.** **a**, Position of a fiducial marker as a function of time (100 kHz data blocked to 10 Hz bandwidth). **b**, Position power spectral density recorded for a fiducial marker in comparison to the stability of the benchmark setup (Abbondanzieri *et al.*, 2005<sup>7</sup>) and previously recorded data (Mahamdeh *et al.*, 2009<sup>27</sup> and Jannasch *et al.*, 2011<sup>37</sup>). **c**, Allan deviation as a function of lag time for the same data. Note that the setup was moved from a third-floor laboratory at the TU Dresden, Germany, where previous data<sup>27,37</sup> was recorded, to a basement room at the University of Tübingen, Germany, with excellent vibration and sound isolation and temperature stability.<sup>57</sup>

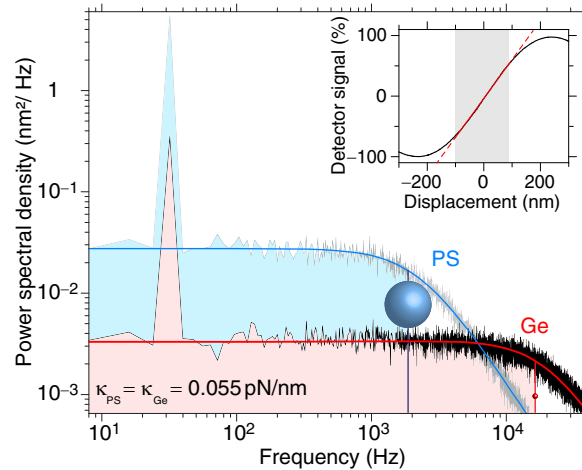

**Extended Data Fig. 2 | Spatiotemporal precision of optically trapped germanium nanospheres (GeTOPs).** Power spectral density (average of 40 individual power spectra) of GeTOP (70-nm diameter, germanium (Ge), black line) and microsphere motion (0.59- $\mu\text{m}$  diameter, polystyrene (PS), grey line) trapped in water. Spectra feature a calibration peak at 32 Hz (red and blue lines, fit to theory,<sup>28</sup> see methods). Corner frequencies  $f_c$  are indicated by vertical lines through schematic, proportionally scaled spheres. The corner frequency serves as a measure for the available measurement bandwidth (shaded areas). Inset: lateral detector response of a surface-immobilized GeTOP as a function of displacement relative to the trap centre (black line, linear fit red line). Because of the fluctuation-dissipation theorem, the area underneath the power spectra of the GeTOP and microsphere motion is the same. However, power is distributed differently across the frequency space with a higher corner frequency and lower positional noise level at low frequencies for the GeTOPs compared to the microsphere allowing for an improved spatiotemporal resolution.

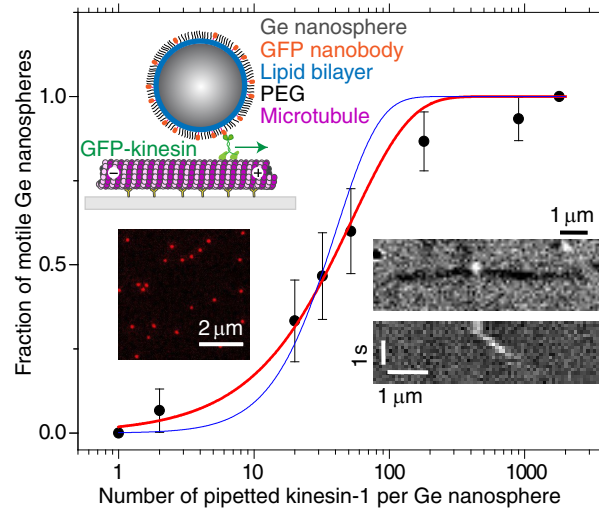

**Extended Data Fig. 3 | Single kinesins transported lipid-bilayer-coated GeNTOPs.** Fraction of motile GeNTOPs as a function of kinesin-to-GeNTOP ratio. Data (black circles, 40 tested nanospheres per condition) with Poisson statistics fit (transport by at least one (red line) or at least two (blue line) motors, see methods). Inset: Schematic of a kinesin motor transporting a functionalized GeNTOP along a microtubule drawn roughly to scale (top left). Confocal image of lipid bilayer-coated GeNTOPs with a membrane dye confirmed the presence of the lipid bilayer (left). Interference reflection microscopy image and kymograph (right) of a single kinesin-transported GeNTOP placed on a microtubule with the optical tweezers (bright and dark contrast, respectively).

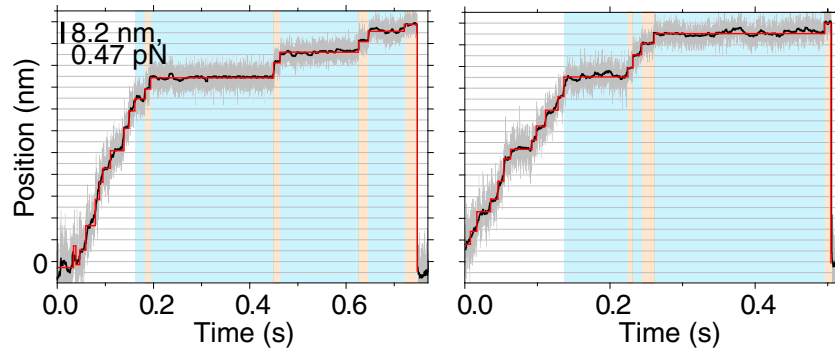

**Extended Data Fig. 4 | Exemplary kinesin traces at physiological ATP concentrations.** Time traces for a single-kinesin powered GeNTOP (100 kHz bandwidth, grey trace; filtered data,  $\approx 100$  Hz, black trace; detected steps, red line; see methods). Long and short dwell times  $\tau_1$  and  $\tau_2$  are blue and orange shaded, respectively.

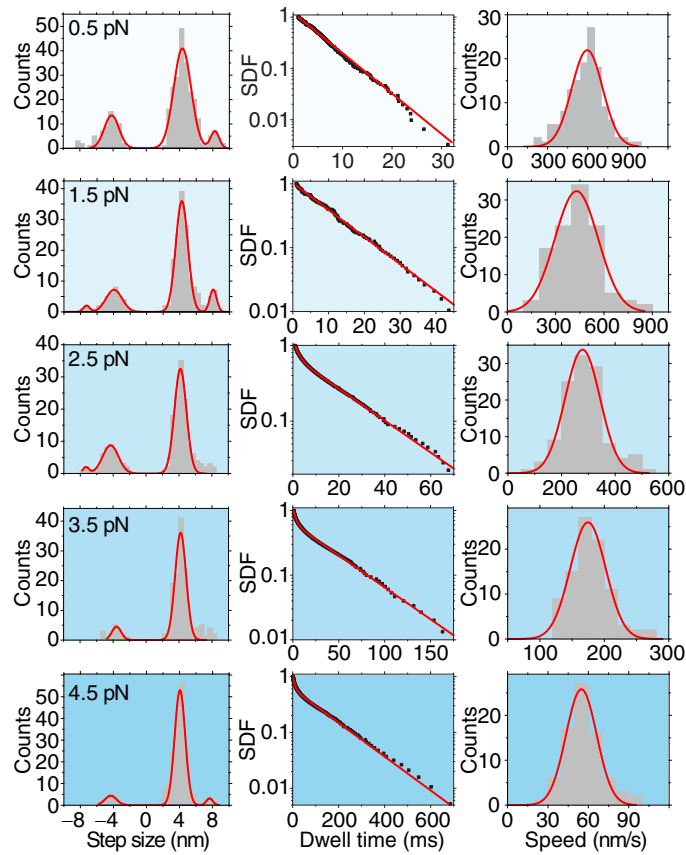

**Extended Data Fig. 5 | Step size, dwell time, and speed distributions versus force at physiological ATP concentrations.** Step size histograms with multi-Gaussian fit (left column), survival distribution functions (SDFs) of dwell times with fits of single or sum of two exponentials (middle column) and speed histograms with Gaussian fit (right column) for forces range with centres from 0.5 pN to 4.5 pN (top to bottom). See Extended Table 1 for fit results.

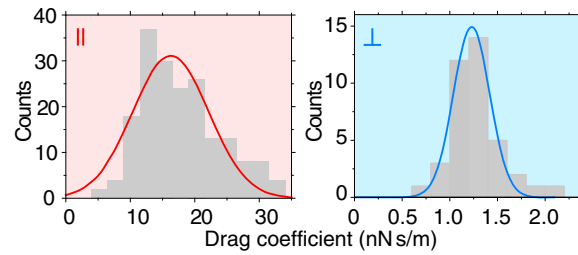

**Extended Data Fig. 6 | Frictional drag coefficient based on fast backward motion.**

Histograms of the frictional drag coefficient measured parallel ( $\gamma_{\parallel}$ , left, red shaded) and perpendicular ( $\gamma_{\perp}$ , right, blue shaded) to the microtubule axis with Gaussian fits (red and blue lines). The frictional drag coefficient for the two directions was calculated according to  $\gamma = \tau\kappa$  using the measured values for the relaxation time and trap stiffness (see Fig. 3 and methods). The resulting values for  $\gamma_{\parallel}$  and  $\gamma_{\perp}$  are  $16.0 \pm 0.8$  nN s/m ( $N = 149$ ) and  $1.24 \pm 0.07$  nN s/m ( $N = 50$ ), respectively. The latter frictional drag coefficient  $\gamma_{\perp}$  was larger than the hydrodynamic (viscous) drag coefficient expected from Stokes drag and the measured GeNTOP size. The ratio between the measured coefficient  $\gamma_{\perp}$  and the calculated Stokes drag coefficient is about 1.9. This increase is due to the surface proximity.<sup>29</sup> Based on Faxén's law, this ratio is consistent with the GeNTOP being 10 nm away from the surface.



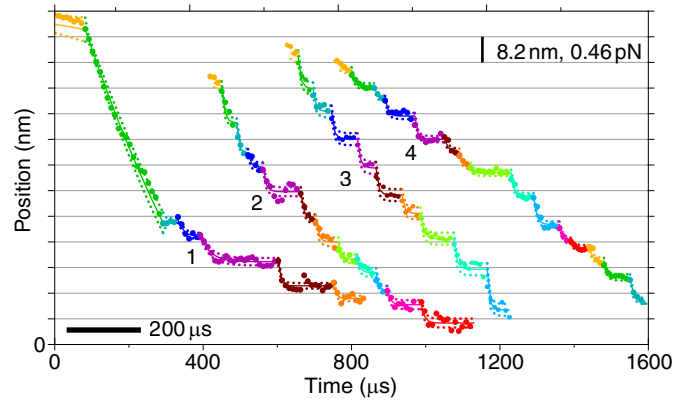

**Extended Data Fig. 7 | Exemplary kinesin traces of fast, biased sliding motion in the weakly bound diffusive state.** Coloured sections correspond to detected states fitted with a single exponential relaxation using the “Steppi” algorithm.<sup>31</sup> Traces 1 and 2 had no constraints resulting in a step size of  $7.7 \pm 0.1$  nm and exponential relaxation time of  $27 \pm 3$   $\mu$ s ( $N = 20$ , excluding the first step of Trace 1). For Traces 3 and 4, the relaxation time constant was fixed to 25  $\mu$ s (see methods). The force scale bar is based on the average trap stiffness for the four traces.

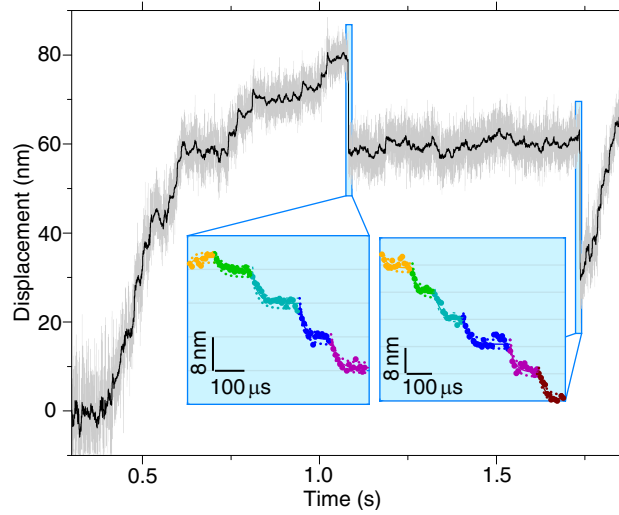

**Extended Data Fig. 8 | Exemplary kinesin trace with short slip events.** Time traces for a single-kinesin powered GeNTO (100 kHz bandwidth, grey trace; filtered data,  $\approx 100$  Hz, black trace; see methods). Insets: Magnified view of short backward slips. Coloured sections correspond to detected states fitted with a single exponential relaxation using the “Steppi” algorithm.<sup>31</sup>

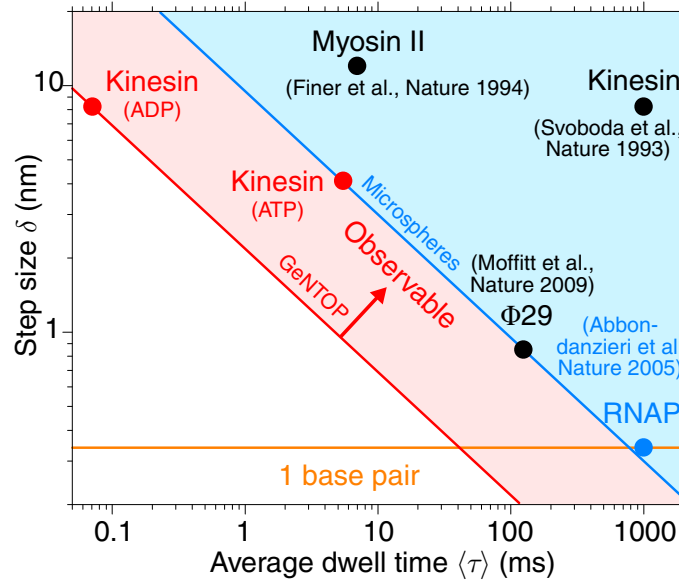

**Extended Data Fig. 9 | Optical tweezers spatiotemporal resolution of molecular machines.** Step size versus dwell time for various molecular machines<sup>7,9,58,59</sup> in comparison to this work (red circles, 4-nm directed substeps (ATP, 0–1 pN data point of Extended Table 1), fast 8-nm sliding steps (ADP state, Fig. 3a)). Blue and red line indicate previous, microsphere benchmark<sup>7</sup> and current GeNTOP spatiotemporal resolution (this work), respectively, according to the relation  $\delta \sqrt{\langle \tau \rangle}$ .<sup>2</sup> The half space above the lines is observable.

**Extended Data Table 1 | Step size, dwell time and speed versus force at 1 mM ATP.**

| $F$      | $\delta_+$ (nm)       | $p$ | $\delta_-$ (nm)    | $p$ | $\tau_1$ (ms)        | $p$ | $\tau_2$ (ms)      | $p$ | $v$ ( $\mu\text{m/s}$ ) |
|----------|-----------------------|-----|--------------------|-----|----------------------|-----|--------------------|-----|-------------------------|
| 0–1      | $4.34 \pm 0.06$ (217) | 72  | $4.2 \pm 0.2$ (65) | 22  | $5.5 \pm 0.2$ (306)  | 120 | –                  | –   | $0.60 \pm 0.01$ (134)   |
|          | $8.2 \pm 0.6$ (19)    | 6   |                    |     |                      |     |                    |     |                         |
| 1–2      | $4.25 \pm 0.04$ (140) | 72  | $4.0 \pm 0.2$ (34) | 18  | $10.3 \pm 0.8$ (193) | 103 | –                  | –   | $0.43 \pm 0.01$ (110)   |
|          | $7.8 \pm 0.2$ (15)    | 8   | $8.2 \pm 0.6$ (4)  | 2   |                      |     |                    |     |                         |
| 2–3      | $4.19 \pm 0.04$ (127) | 71  | $4.1 \pm 0.2$ (42) | 25  | $20.6 \pm 0.1$ (100) | 71  | $2.1 \pm 0.7$ (78) | 50  | $0.28 \pm 0.01$ (117)   |
|          | $7.3 \pm 0.5$ (4)     | 2   | $7.3 \pm 0.5$ (5)  | 2   |                      |     |                    |     |                         |
| 3–4      | $4.18 \pm 0.05$ (127) | 85  | $3.9 \pm 0.4$ (16) | 10  | $44.7 \pm 0.4$ (84)  | 63  | $3.3 \pm 0.7$ (66) | 49  | $0.18 \pm 0.01$ (112)   |
|          | $7.8 \pm 0.2$ (7)     | 5   |                    |     |                      |     |                    |     |                         |
| $\geq 4$ | $4.06 \pm 0.03$ (168) | 89  | $4.3 \pm 0.4$ (16) | 8   | $144 \pm 2$ (104)    | 60  | $8.8 \pm 0.2$ (86) | 47  | $0.055 \pm 0.001$ (92)  |
|          | $7.6 \pm 0.4$ (6)     | 3   |                    |     |                      |     |                    |     |                         |

$F$  (pN): force,  $\delta_{+/-}$ : forward/backward step size (Gaussian centre  $\pm$  fit error ( $N$  based on area underneath Gaussian normalized by total number of steps)),  $p$  (%): relative percentage,  $\tau$ : dwell time based on survival function fit ( $N$  according to relative amount), and  $v$ : speed (mean  $\pm$  standard error ( $N$ : number of trace segments fitted)). All fits to data of Extended Data Fig. 5. Note that only few data points correspond to forces larger than 5 pN. Also note that  $p$ -values for dwell times directly reflect the fitted amplitude that may add up to more than 100% indicating that some of the expected very short steps were missed. Errors on all percentages are less than 1%.

**Extended Data Table 2 | Step size, dwell time and speed versus force at 10  $\mu$ M ATP.**

| $F$      | $\delta_+$ (nm)      | $p$ | $\delta_-$ (nm)    | $p$ | $\tau_1$ (ms)       | $p$ | $\tau_2$ (ms)      | $p$ | $v$ ( $\mu$ m/s)       |
|----------|----------------------|-----|--------------------|-----|---------------------|-----|--------------------|-----|------------------------|
| 0–1      | 4.13 $\pm$ 0.06 (53) | 67  | 4.2 $\pm$ 0.2 (15) | 20  | 30.2 $\pm$ 0.6 (44) | 65  | 3.1 $\pm$ 0.2 (34) | 47  | 0.23 $\pm$ 0.01 (12)   |
|          | 7.2 $\pm$ 0.2 (10)   | 13  |                    |     |                     |     |                    |     |                        |
| 1–2      | 4.15 $\pm$ 0.03 (53) | 69  | 4.5 $\pm$ 0.4 (9)  | 11  | 37.8 $\pm$ 0.7 (42) | 61  | 3.3 $\pm$ 0.1 (34) | 49  | 0.16 $\pm$ 0.01 (17)   |
|          | 7.6 $\pm$ 0.36 (15)  | 20  |                    |     |                     |     |                    |     |                        |
| 2–3      | 4.05 $\pm$ 0.03 (59) | 78  | 4.5 $\pm$ 0.5 (7)  | 9   | 54.3 $\pm$ 0.1 (40) | 58  | 3.8 $\pm$ 0.1 (37) | 52  | 0.110 $\pm$ 0.007 (13) |
|          | 7.5 $\pm$ 0.17 (10)  | 13  |                    |     |                     |     |                    |     |                        |
| 3–4      | 4.17 $\pm$ 0.05 (42) | 70  | 4.3 $\pm$ 0.2 (6)  | 10  | 131 $\pm$ 3 (33)    | 57  | 6.8 $\pm$ 0.3 (27) | 45  | 0.056 $\pm$ 0.005 (15) |
|          | 7.84 $\pm$ 0.36 (12) | 20  |                    |     |                     |     |                    |     |                        |
| $\geq 4$ | 4.12 $\pm$ 0.04 (77) | 85  | 3.9 $\pm$ 0.2 (6)  | 7   | 245 $\pm$ 5 (41)    | 56  | 8.0 $\pm$ 0.3 (40) | 45  | 0.032 $\pm$ 0.004 (15) |
|          | 8.12 $\pm$ 0.13 (7)  | 8   |                    |     |                     |     |                    |     |                        |

$F$  (pN): force,  $\delta_{+/-}$ : forward/backward step size (Gaussian centre  $\pm$  fit error ( $N$  based on area underneath Gaussian normalized by total number of steps)),  $p$  (%): relative percentage,  $\tau$ : dwell time based on survival function fit ( $N$  according to relative amount), and  $v$ : speed (mean  $\pm$  standard error ( $N$ : number of trace segments fitted)). Note that only few data points correspond to forces larger than 5 pN. Also note that  $p$ -values for dwell times directly reflect the fitted amplitude that may add up to more than 100% indicating that some of the expected very short steps were missed. Errors on all percentages are less than 1%.

## Extended Data References

57. Hermsdorf, G. L., Szilagy, S. A., Rösch, S. & Schäffer, E. High performance passive vibration isolation system for optical tables using six-degree-of-freedom viscous damping combined with steel springs. *Rev. Sci. Instrum.* **90**, 015113 (2019).
58. Finer, J. T., Simmons, R. M. & Spudich, J. A. Single myosin molecule mechanics : piconewton forces and nanometre steps. *Nature* **368**, 113–119 (1994).
59. Moffitt, J. R. *et al.* Intersubunit coordination in a homomeric ring ATPase. *Nature* **457**, 446–450 (2009).
